# Supplementary material for: Use of surface-modified porous silicon nanoparticles to deliver temozolomide with enhanced pharmacokinetic and therapeutic efficacy for intracranial glioblastoma in mice
Source: Royal Society of Chemistry journal article supplement (doi:10.1039/d4tb00631c), 2024-01-01
Supplement: d4tb00631c2.xlsx [file d4tb00631c2.xlsx]

## Sheet: Loading efficiency
Loading efficiency (%)
	pSiNP-H[TMZ]	pSiNP-C18[TMZ]
1	29.85	35.2
2	22.74	24.27
3	23.53	33.94
4	28.13	28.13

## Sheet: TMZ release test
Released TMZ (%)
Time (h)	pSiNP-H[TMZ]				pSiNP-C18[TMZ]
0	0	0	0	0	0	0	0	0
0.5	87.19	84.7415	83.7146	67.5577	57.69	49.0998	60.6657	63.1087
1	104.34	101.386	87.1589	101.035	84.28	75.0994	72.2518	66.3607
3	99.35	96.5402	88.9824	100.089	95.6	99.2944	69.9356	83.6334
6	102.92	100	99.9747	98.6172	106.89	98.9037	72.3979	84.6569
12	100.75	100	100	99.7872	99.72	100	95.619	92.9751
24	100.35	100	100	100	100.18	100	100	98.8298

## Sheet: Nanoparticle Sizes
Intensity (%)
Size (d.nm)	pSiNP-H	pSiNP-H[TMZ]	pSiNP-C18	pSiNP-C18[TMZ]
0.3	0	0	0	0
0.3489	0	0	0	0
0.4057	0	0	0	0
0.4718	0	0	0	0
0.5487	0	0	0	0
0.6381	0	0	0	0
0.742	0	0	0	0
0.8629	0	0	0	0
1.003	0	0	0	0
1.167	0	0	0	0
1.357	0	0	0	0
1.578	0	0	0	0
1.835	0	0	0	0
2.134	0	0	0	0
2.482	0	0	0	0
2.886	0	0	0	0
3.357	0	0	0	0
3.903	0	0	0	0
4.539	0	0	0	0
5.279	0	0	0	0
6.139	0	0	0	0
7.139	0	0	0	0
8.302	0	0	0	0
9.655	0	0	0	0
11.23	0	0	0	0
13.06	0	0	0	0
15.18	0	0	0	0
17.66	0	0	0	0
20.53	0	0	0	0
23.88	0	0	0	0
27.77	0	0	0	0
32.3	0	0	0	0
37.56	0	0	0	0
43.68	0	0.05695	0	0
50.79	0	0.0589	0	0
59.07	0	0.0764	0	0
68.69	0.245	0.3574	0	0.1042
79.88	1.749	1.162	0.1326	0.6039
92.89	4.229	2.617	1.627	1.791
108	7.055	4.647	4.515	3.841
125.6	9.651	6.991	8.141	6.664
146.1	11.61	9.28	11.6	9.848
169.9	12.67	11.12	14.05	12.74
197.6	12.74	12.2	14.96	14.61
229.8	11.83	12.33	14.16	14.92
267.2	10.07	11.5	11.89	13.46
310.7	7.736	9.841	8.704	10.51
361.3	5.184	7.646	5.326	6.785
420.2	2.843	5.269	2.474	3.262
488.7	1.098	3.081	0.6622	0.8646
568.3	0.1778	1.39	0	0
660.9	0	0.3709	0	0
768.5	0	0	0	0
893.8	0	0	0	0
1039	0	0	0	0
1209	0	0	0	0
1406	0	0	0	0
1635	0	0	0	0
1901	0	0	0	0
2211	0	0	0	0
2571	0	0	0	0
2990	0	0	0	0
3477	0	0	0	0
4043	0	0	0	0
4702	0	0	0	0
5468	0	0	0	0
6358	0	0	0	0
7394	0	0	0	0
8599	0	0	0	0
10000	0	0	0	0

## Sheet: TMZ  concentration in plasma
TMZ concentraion (ug/ml)
Time (H)	TMZ			pSiNP-H[TMZ]			pSiNP-C18[TMZ]
0.5	18.23	16.45	15.42	16.46	20.98	18.26	4.28	6.21	11.51
1	16.4	12.71	12.34	16.97	14.08	23.16	29.03	30.91	26.96
4	1.26	1.63	1.33	2.3	2.14	1.66	1.54	2.2	1.66

## Sheet: TMZ  concentration in brain
TMZ concentraion (ug/g)
Time (H)	TMZ			pSiNP-H[TMZ]			pSiNP-C18[TMZ]
0.5	10.5436	9.38	8.63942	8.48167	10.1371	8.7227	14.4371	17.4709	16.2602
1	8	5.28	5.6	7.81731	7.35792	11.1422	13.63	16.52	12.03
4	0.552195	0.239396	0.222454	1.45205	0.937605	1.68	1.62	1.53	0.91

## Sheet: Tumor vulume
Tumor Volume (mm3)
No.	Control	TMZ	pSiNP-H	pSiNP-H[TMZ]	pSiNP-C18	pSiNP-C18[TMZ]
1	1.99561	1.55542	2.36625	1.1588	2.04583	0.724785
2	2.23967	1.45509	2.13445	0.926473	2.53313	0.500834
3	2.18311	0.904886	2.18361	1.17518	2.43628	0.606419
4	1.28571	1.50857	1.91022	0.897634	1.55977	0.492273
5	1.54278	0.883206	1.53094	0.97878	0.948406	0.73224
6	2.03451	0.894405	1.59479	0.833126	1.3125	0.586446
7	2.01021	1.18782	1.44472	0.722667	1.18988	0.129156
8	1.36567	0.929343	1.8099	1.28098	0.850991	0.306779
9	1.87221	0.796664	1.63471	1.00621	1.91751	0.456719
10	1.6645	1.60135	1.33851	0.947481	1.81857	0.665632

## Sheet: Immunohistochemistry
Area(%)-Ki67 positive
No.	Control	TMZ	pSiNP-H	pSiNP-H[TMZ]	pSiNP-C18	pSiNP-C18[TMZ]
1	9.49	5.06	9.48	5.05	9.7	2.53
2	12.65	7.82	9.5	3.31	10.94	2.54
3	12.39	7.78	11.29	2.62	9.92	2.98
4	10.56	4.25	17.82	3.06	11.37	2.7
Area(%)-cleaved caspase-3 positive
No.	Control	TMZ	pSiNP-H	pSiNP-H[TMZ]	pSiNP-C18	pSiNP-C18[TMZ]
1	2.25	3.27	1.26	3.33	1.13	8.5
2	2.02	4.65	2.02	8.71	1.18	4.96
3	0.51	2.85	1.87	5.02	1.94	9.33
4	2.1	2.85	1.94	3.13	0.76	5.67

## Sheet: Survival
Survival curve
	Day	CTRL	TMZ	pSiNP-H	pSINP-H[TMZ]	pSiNP-C18	pSiNP-C18[TMZ]
1	30	1
2	41	1
3	46	1
4	48	1
5	52	1
6	59	1
1	57		1
2	59		1
3	59		1
4	62		1
5	62		1
6	65		0
1	28			1
2	44			1
3	47			1
4	48			1
5	52			1
6	60			1
1	52				1
2	55				1
3	65				1
4	65				0
5	65				0
6	65				0
1	38					1
2	44					1
3	55					1
4	55					1
5	59					1
6	65					0
1	65						1
2	65						0
3	65						0
4	65						0
5	65						0
6	65						0

## Sheet: ALT, AST, Creatinine
ALT (mU/mL)
No.	Control	TMZ	pSiNP-H	pSiNP-H[TMZ]	pSiNP-C18	pSiNP-C18[TMZ]
1	13.452	12.835	15.947	15.788	21.011	20.73
2	17.193	16.535	14.304	15.077	15.895	17.605
3	20.195	12.371	10.499	20.567	19.669	33.596
4	15.563	13.9	15.59	19.825	20.525	22.137
5	17.881	16.042	14.562	16.84	21.506	15.877
6	15.044	25.135	16.782	20.752	20.113	16.983
AST (mU/mL)
No.	Control	TMZ	pSiNP-H	pSiNP-H[TMZ]	pSiNP-C18	pSiNP-C18[TMZ]
1	30.95	25.169	28.921	29.792	33.095	33.427
2	31.785	24.72	34.271	24.038	31.785	25.896
3	33.526	32.601	23.93	29.164	27.665	31.435
4	30.277	27.512	25.124	26.13	29.029	28.293
5	28.813	26.462	29.199	26.076	30.77	25.797
6	20.6	22.898	24.729	28.598	28.607	29.442
Creatinine (umol/L)/mL)
No.	Control	TMZ	pSiNP-H	pSiNP-H[TMZ]	pSiNP-C18	pSiNP-C18[TMZ]
1	18.6538	19.7692	15.1923	20.8462	18.9615	17.1538
2	17.8077	17.5769	19.9231	24.1923	22.0769	27.1154
3	15.6154	22.3846	32.5385	15.4615	17.7308	19.1154
4	30.1923	26.6538	17.4615	20.2692	15.4231	27.2308
5	14.4615	14.9231	19.6923	22.4615	30.2308	26.1154
6	17.9231	19.9231	23.8846	33.1923	21.2692	21.1538
7		15.3846		21.8846	18.1538	22.2308
8				18.8462

## Sheet: Cell cycle analysis
Polulation (%)
	SubG1			G1			S			G2/M
CTRL	4.19	2.16	2.25	60.2	58	59.1	17.4	16.6	16.1	18.8	19.5	18.1
Vehicle	2.35	2.33	3.87	60.7	58.6	63.7	16.6	16.6	14.5	15.7	19.4	16.2
pSiNP-H	4.06	2.44	3.37	60.8	57.7	58.1	17.4	16.4	17.6	18	19.9	19.4
pSiNP-C18	4	2.92	2.18	60.7	57.2	64	18	16.2	17.3	17.5	19.7	18.5
TMZ	31.7	24	17.2	9.17	6.17	8.58	14.1	8.07	18.9	40.6	52.7	49.7
pSiNP-H[TMZ]	24	26.9	15.6	5.39	7.08	9.04	13.2	10.5	13	51.8	46.1	54.2
pSiNP-C18[TMZ]	24.4	26.3	20.3	6.13	6.79	11.1	13.9	9.86	16.5	50.3	48.8	47.3
